# Supplementary material for: A FRET-based ratiometric fluorescent probe to detect cysteine metabolism in mitochondria
Source: Royal Society of Chemistry journal article supplement (doi:10.1039/d0ob00002g), 2020-01-01
Supplement: d0ob00002g1.pdf [file d0ob00002g1.pdf]

Supplementary Information

**A FRET-based ratiometric fluorescent probe to detect cysteine metabolism in mitochondria**

Xiaojing Han<sup>a,#</sup>, Zhiyao Zhai<sup>a</sup>, Xiaopeng Yang<sup>a,#</sup>, Di Zhang<sup>b,\*</sup>, Jun Tang<sup>a</sup>, Jianming Zhu<sup>a</sup>, Xiaofei Zhu<sup>a,c,\*</sup>, Yong Ye<sup>a\*</sup>

<sup>a</sup> *Green Catalysis Center, and College of Chemistry, Zhengzhou University, Zhengzhou 450001, China*

<sup>b</sup> *Institute of Agricultural Quality Standards and Testing Technology, Henan Academy of Agricultural Sciences, Zhengzhou 450002, China*

<sup>c</sup> *Journal of Zhengzhou University, Zhengzhou University, Zhengzhou, China*

\*Corresponding author; Email: yeyong03@tsinghua.org.cn (Yong Ye)

# They equally contribute to this paper

Table of contents

Cell Culture and imaging . . . . . S3

Figure S1. . . . .S3

Figure S2. . . . .S4

Figure S3. . . . .S4

Figure S4. . . . .S5

FigureS5 . . . . .S5

FigureS6. . . . .S6

### Cell Culture and Imaging

MCF-7 cells were grown in RPMI-1640 provided with 10% PBS, at 37 °C, under 5% CO<sub>2</sub>. Probe **CP-K** (10 μM) was added to MCF-7 cells and incubated at 37 °C for 0.5 hour in 5%CO<sub>2</sub>. Next, PBS buffer (pH 7.4) wash the cell for three times. Then, the cells were added to NaHSO<sub>3</sub> solution for another 30 min in 5% CO<sub>2</sub> and washed three times with PBS buffer. Colocalization experiment the MCF-7 cells were processed a mitochondria staining probe, Mito Tracker Green FM (500 nM) and probe **CP-K** (10 μM) for additional 0.5 h and washed with PBS buffer (pH 7.4). To monitor cysteine metabolism, MCF-7 cells were incubated with 10 mM of Cys for 0.5 h and then treated 10 μM probe for 4 h. The cells imaging were used by Leica TCS SP8 confocal microscope.

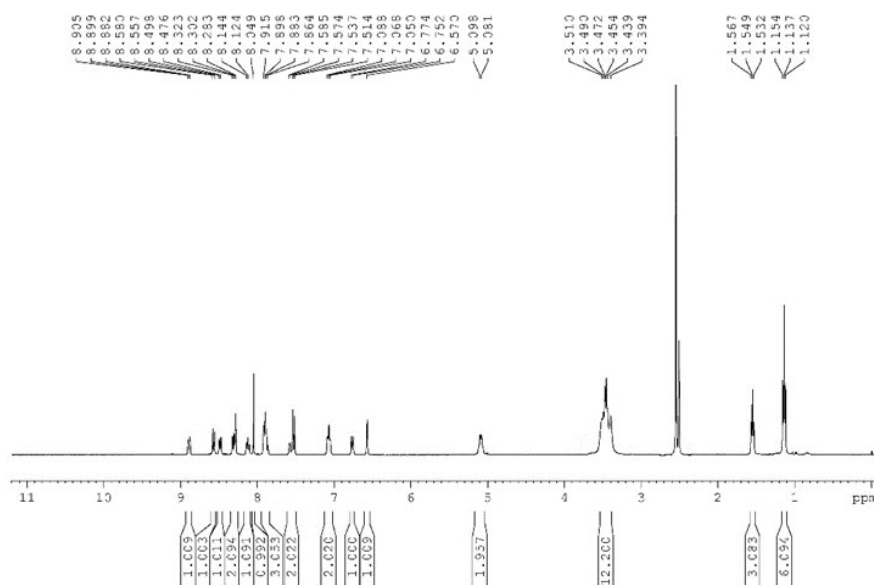

**Figure S1.** <sup>1</sup>H NMR spectrum of CP-K in DMSO-d<sub>6</sub>.

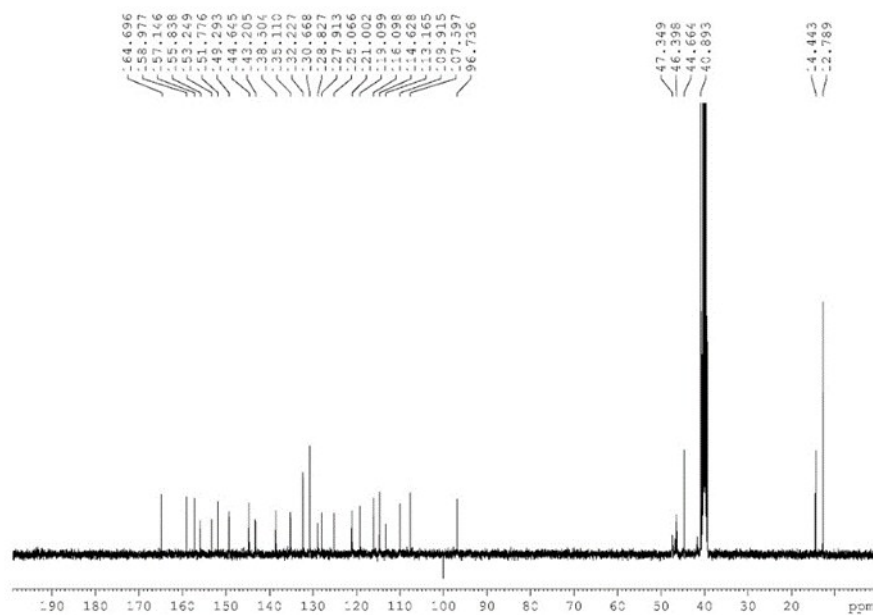

**Figure S2.**  $^{13}\text{C}$  NMR spectrum of CP-K in  $\text{DMSO-d}_6$ .

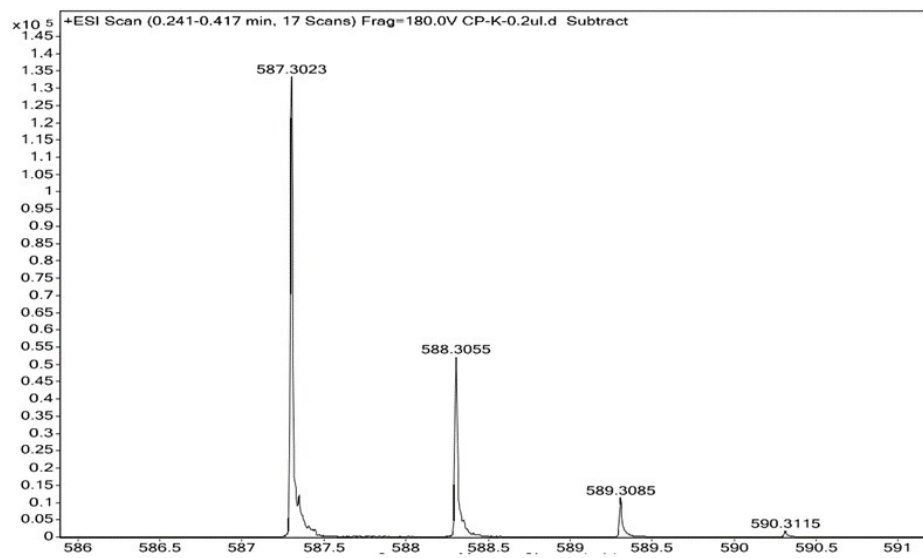

**Figure S3.** HR-MS spectra of CP-K.

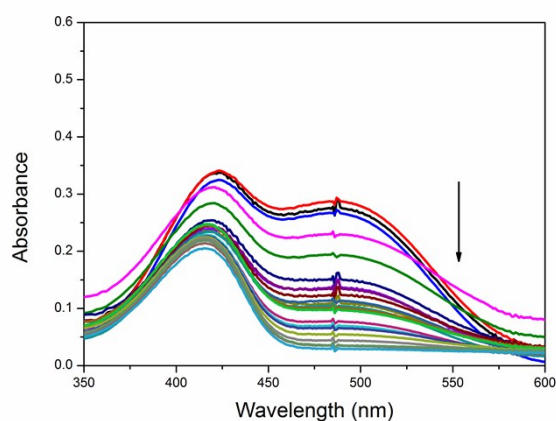

**Figure S4.** The UV-vis spectra of probe CP-K (10.0  $\mu\text{M}$ ) in the presence of  $\text{NaHSO}_3$  (0–10 equiv.) in the PBS buffer (10 mM, pH=7.4, containing 50% ethanol).

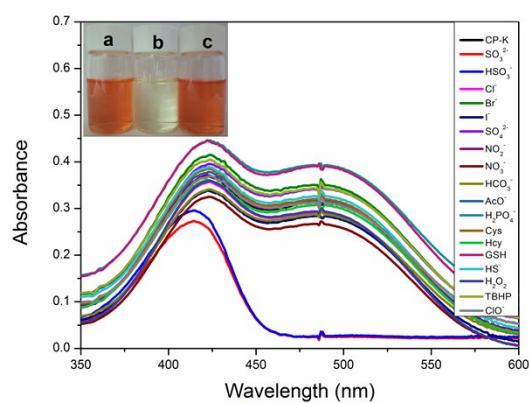

**Figure S5.** The UV-vis spectra of probe CP-K (10  $\mu\text{M}$ ) with  $\text{NaHSO}_3$  (10 equiv.) and other various anions (10 equiv.) in the PBS buffer (10 mM, pH=7.4, containing 50% ethanol). (a: probe, b: probe+ $\text{NaHSO}_3$ , c: probe+Competing species)

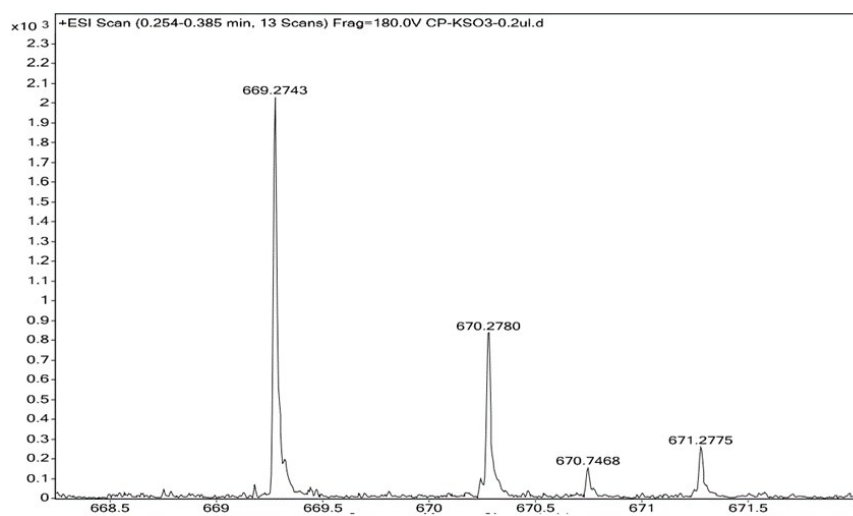

**Figure S6.** HR-MS spectra of **CP-K** in the presence of HSO-3 (10 equiv.).
